# Supplementary material
Source: ML conference proceedings conference paper supplement (https://openaccess.thecvf.com/content/CVPR_2019/html/Wang_Normalized_Object_Coordinate_CVPR_2019_paper.html)
Supplement: Supplementary file 3 [file Wang_Normalized_Object_Coordinate_CVPR_2019_supplemental.zip]

Archive with 5 entries (4 files):
- NOCS_CVPR2019_lowres.mp4
- __MACOSX/
- __MACOSX/._NOCS_CVPR2019_lowres.mp4
- NOCS_CVPR2019_Supp.pdf
- __MACOSX/._NOCS_CVPR2019_Supp.pdf
